# Supplementary material for: Outcomes of Recurrent Nasopharyngeal Carcinoma Patients Treated With Salvage Surgery: A Meta-Analysis
Source: Front Oncol. 2021 Oct 8;11:720418. doi: 10.3389/fonc.2021.720418 (PMC8531649; doi:10.3389/fonc.2021.720418)
Supplement: Supplementary file 1 [file Table_1.xlsx]

## Sheet: Supplemental Table S1
Patient No.	Sex	Operation type	Margin status	Adjuvant therapy	Stage	outcome(MO)
						LR or DM	Death	Survival
1	M	Open	-	No	rT1			93
2	M	Open	-	No	rT1			89
3	M	Open	-	No	rT1			58
4	M	Open	-	No	rT1			56
5	M	Open	-	No	rT1			20
6	F	Open	-	No	rT1			35
7	M	Open	-	No	rT1			33
8	M	Open	-	No	rT1			22
9	M	Open	+	RT	rT3			62
10	M	Open	+	RT	rT2	10		67
11	M	Open	+	RT	rT2	21		61
12	F	Open	+	RT	rT2		44
13	M	Open	+	RT	rT3		23
14	M	Open	-	No	rT1		25
15	M	Open	-	No	rT1		24
16	F	Open	-	No	rT2		20
17	M	Open	-	No	rT2			22
18	M	Open	-	No	rT1			21
19	M	Open	-	No	rT2			24
20	F	Open	-	No	rT1			7
21	M	Open	-	No	rT2			20
22	M	Open	+	RT	rT2			17
23	M	Open	+	RT	rT2			9
24	M	Open	-	No	rT1			7
25	M	Open	-	No	rT1			5
26	M	Open	-	No	rT1			5
27	M	Open	-	No	rT1	34		36
28	M	Open	-	No	rT4			0
29	M	Open	N/A	RT	rT2	5	12
30	F	Open	N/A	RT	NA	20	40
31	F	Open	N/A	RT	rT1	28	40
32	F	Open	N/A	RT	rT1	116		117
33	M	Open	N/A	RT	rT4	4	12
34	M	Open	N/A	RT	rT1			94
35	M	Open	N/A	RT	rT2	6	31
36	M	Open	N/A	RT	rT2	13	13
37	F	Open	N/A	RT	rT4	9	14
38	F	Open	N/A	RT	rT2	12	63
39	M	Open	N/A	RT	rT1	13	13
40	M	Open	N/A	RT	rT1	31	35
41	F	Open	N/A	RT	rT2			51
42	M	Open	N/A	RT	rT2			15
43	M	Open	N/A	RT	rT4	3	9
44	M	Open	N/A	RT	rT2	8		17
45	M	Open	N/A	RT	rT3			3
46	M	Open	N/A	RT	rT1			6
47	M	Open	-	No	rT1	N/A	14
48	M	Open	-	No	rT3			38
49	M	Open	-	No	rT2	N/A	31
50	M	Open	+	RT	rT4		3
51	M	Open	-	No	rT4	N/A	18
52	M	Open	+	RT	rT3			45
53	F	Open	-	No	rT1	N/A	69
54	M	Open	-	No	rT3			50
55	M	Open	-	No	rT1			35
56	3	Open	-	No	rT3			88
57	M	Open	-	No	rT1			72
58	F	Open	-	No	rT1			66
59	F	Open	-	No	rT1			76
60	M	Open	+	RT	rT4	N/A	36
61	M	Open	-	No	rT1			35
62	M	Open	-	No	rT1			35
63	F	Open	+	RT	rT4		15
64	F	Open	-	No	rT4			19
65	F	Open	-	No	rT1			26
66	M	Open	-	No	rT1			29
67	M	Open	+	RT	rT3		7
68	M	Open	-	No	rT1			26
69	M	Open	+	RT	rT2		7
70	M	Open	-	No	rT1			24
71	M	Open	-	No	rT3			20
72	M	Open	-	No	rT3			17
73	M	Open	-	No	rT1			16
74	M	Open	-	No	rT2			15
75	M	Open	+	RT	rT3			15
76	M	Open	-	No	rT1			15
77	M	Open	-	No	rT1			12
78	F	Open	-	No	rT3	N/A	10
79	M	Open	-	No	rT3			6
80	M	Open	-	No	rT1			6
81	M	Open	-	No	rT3			4
82	M	Open	-	No	rT2			4
83	M	Open	+	RT	rT4			2
84	F	Open	-	No	rT4			2
85	F	Endoscopic	-	No	rT2	6
				CHT			32
86	F	Endoscopic	-	No	rT2	5		48
87	M	Endoscopic	-	No	rT2	4	6
88	M	Endoscopic	-	No	rT1			42
89	M	Endoscopic	+	RT	rT1			37
90	M	Endoscopic	-	No	rT1		6
91	F	Endoscopic	-	No	rT1			36
92	M	Endoscopic	-	No	rT2		12
93	M	Endoscopic	-	No	rT2	6
				CCRT			14
94	M	Endoscopic	-	No	rT2	2
				CHT			12
95	F	Endoscopic	-	No	rT1			29
96	M	Endoscopic	-	No		5
				CHT	rT2		8
97	M	Endoscopic	+	CCRT	rT2			20
98	F	Endoscopic	-	No	rT2		18
99	F	Endoscopic	-	No	rT1			18
100	M	Endoscopic	-	No	rT2			17
101	M	Endoscopic	+	CHT	rT1			16
102	F	Endoscopic	-	No	rT2	12		13
103	M	Endoscopic	-	No		6
				CHT	rT1			11
104	M	Endoscopic	-	No	rT1			11
105	M	Endoscopic	-	No	rT2			11
106	M	Endoscopic	-	No	rT2		3
107	M	Endoscopic	-	No		2
				CHT	rT1			7
108	M	Endoscopic	-	No	rT2			7
109	M	Endoscopic	-	No	rT2			6
110	M	Endoscopic	-	No	rT1			6
111	M	Endoscopic	-	No	rT2			5
112	M	Endoscopic	-	No	rT2			3
113	F	Endoscopic	N/A	No	rT1			103
114	M	Endoscopic	N/A	CHT	rT3	N/A		78
115	F	Endoscopic	N/A	No	rT1			56
116	F	Endoscopic	N/A	No	rT1			40
117	M	Endoscopic	N/A	CHT	rT3	N/A		32
118	M	Endoscopic	N/A	No	rT2			28
119	M	Endoscopic	N/A	No	rT1			28
120	M	Endoscopic	N/A	No	rT1			21
121	M	Endoscopic	N/A	No	rT3		15
122	M	Endoscopic	N/A	No	rT1			12
123	M	Endoscopic	N/A	No	rT1			12
124	M	Endoscopic	N/A	No	rT1			12
125	F	Endoscopic	N/A	No	rT1			10
126	M	Endoscopic	+	No	rT2	N/A
			-	CCRT				28.6
127	M	Endoscopic	-	No	rT1	5.5
				CHT				37.5
128	M	Endoscopic	-	No	rT2			34.7
129	F	Endoscopic	+	CCRT	rT2	34.5		34.5
130	M	Endoscopic	-	No	rT1			19.9
131	F	Endoscopic	-	No	rT2			18.6
132	F	Endoscopic	-	No	rT1			14.1
133	M	Endoscopic	-	No	rT3	25.5
			+	NA				34
134	M	Endoscopic	-	No	rT1			17.2
135	M	Endoscopic	+	CCRT	rT2	N/A		16.5
136	M	Endoscopic	-	No	rT3	N/A
				CHT				48.6
137	M	Endoscopic	-	RT	rT1			7.2
138	F	Endoscopic	-	No	rT1			3.2
139	F	Robotic	-	No	rT1			39
140	F	Robotic+Endoscopic	-	No	rT3			32
141	F	Robotic+Endoscopic	-	No	rT3	21		32
142	F	Robotic	-	No	rT1			32
143	M	Robotic	-	No	rT2	17		30
144	M	Robotic	-	No	rT3		12
145	M	Robotic	-	No	rT4			26
146	M	Robotic+Endoscopic	+	CHT	rT3	8		21
147	M	Robotic+Endoscopic	-	No	rT3		4
148	F	Robotic+Endoscopic	-	No	rT1			16
149	M	Robotic+Endoscopic	-	No	rT2			14
150	M	Robotic+Endoscopic	-	No	rT3			12
151	M	Endoscopic	-	No	rT1			45
152	M	Endoscopic	-	No	rT1			45
153	M	Endoscopic	-	No	rT2	6		27
154	F	Endoscopic	-	No	rT3			19
155	M	Endoscopic	+	No	rT3			16
156	F	Endoscopic	-	No	rT1			24
157	M	Endoscopic	-	No	rT1			24
158	M	Endoscopic	-	No	rT1			14
159	F	Endoscopic	-	No	rT2			10
160	F	Endoscopic	-	RT	rT1			22
161	M	Endoscopic	-	No	rT1			25
162	M	Endoscopic	-	No	rT1			17
163	M	Endoscopic	-	No	rT1			54
164	M	Endoscopic	-	No	rT1			25
165	F	Endoscopic	-	No	rT1			35
166	M	Endoscopic	-	No	rT1			16
167	M	Endoscopic	-	No	rT1	7		21
168	M	Open	-	No	rT1			56
169	M	Open	-	No	rT1			41
170	F	Open	-	No	rT1			45
171	M	Open	+	No	rT1	N/A		30
172	M	Open	-	No	rT2			49
173	F	Open	-	No	rT2			29
174	M	Open	+	No	rT2			30
175	M	Open	-	No	rT2			41
176	F	Open	-	No	rT3		16
177	M	Open	-	No	rT3		9
178	F	Open	-	No	rT4		11
